# Supplementary material for: Developing an exercise intervention to improve bone mineral density in traumatic amputees: protocol for a Delphi study
Source: HighWire-hosted journal article supplement (doi:10.1136/bmjopen-2023-073062), 2023-10-01
Supplement: bmjopen-2023-073062supp001_data_supplement.pdf [file bmjopen-2023-073062supp001_data_supplement.pdf]

7. I understand that my participation is voluntary, and I am free to withdraw at any time, without giving any reason and without my legal rights being affected. \*

☐ Yes

☐ No

8. I give consent for anonymised information collected about me to be used to support other research or in the development of a new treatment in an academic institution or commercial company in the future, including those outside of the United Kingdom (which Imperial College London has ensured will keep this information secure).

\*

☐ Yes

☐ No

9. I understand that data collected from me are a gift donated to Imperial College and that I will not personally benefit financially if this research leads to the successful development of a new treatment or service.

\*

☐ Yes

☐ No

10. I give consent to being contacted about the possibility to take part in other research studies.

\*

☐ Yes

☐ No

11. I consent to take part in "Designing an exercise intervention to increase bone mineral density in unilateral below knee amputees using the Delphi process".

\*

☐ Yes

☐ No
